# Supplementary material for: Associations of Dietary Patterns and Metabolic-Hormone Profiles with Breast Cancer Risk: A Case-Control Study
Source: MDPI journal article supplement (doi:10.3390/nu10122013), 2018-12-19
Supplement: s1 [file s1]

**Table S1.** The mean (95% CI) of the frequency of food consumption by dietary patterns for cancer-control sample (times/day).

| Food groups <sup>#</sup>                           | Total             | Dietary Patterns       |                   |                   |                    |                   |                   |                                          |                   |                   |                      |                   |                   |
|----------------------------------------------------|-------------------|------------------------|-------------------|-------------------|--------------------|-------------------|-------------------|------------------------------------------|-------------------|-------------------|----------------------|-------------------|-------------------|
|                                                    |                   | 'Non-Healthy' tertiles |                   |                   | 'Prudent' tertiles |                   |                   | 'Margarine and Sweetened Dairy' tertiles |                   |                   | 'Polish-aMED' levels |                   |                   |
|                                                    |                   | bottom                 | middle            | upper             | bottom             | middle            | upper             | bottom                                   | middle            | upper             | low                  | average           | high              |
| Sample size (n)                                    | 420               | 139                    | 141               | 140               | 139                | 140               | 141               | 140                                      | 139               | 141               | 51                   | 224               | 145               |
| Sugar, honey and sweets                            | 1.9<br>(1.7; 2.0) | 1.2<br>(1.0; 1.3)      | 1.7<br>(1.5; 1.8) | 2.8<br>(2.6; 3.0) | 1.7<br>(1.5; 1.9)  | 1.9<br>(1.7; 2.1) | 2.1<br>(1.8; 2.3) | 2.0<br>(1.7; 2.2)                        | 1.7<br>(1.5; 1.9) | 2.0<br>(1.8; 2.2) | 2.1<br>(1.7; 2.4)    | 2.0<br>(1.8; 2.2) | 1.6<br>(1.5; 1.8) |
| Red and processed meats                            | 1.4<br>(1.3; 1.4) | 0.8<br>(0.7; 0.9)      | 1.4<br>(1.3; 1.5) | 1.9<br>(1.8; 2.0) | 1.3<br>(1.2; 1.4)  | 1.3<br>(1.2; 1.5) | 1.5<br>(1.3; 1.6) | 1.4<br>(1.3; 1.5)                        | 1.3<br>(1.1; 1.4) | 1.4<br>(1.3; 1.5) | 1.7<br>(1.5; 1.9)    | 1.5<br>(1.4; 1.6) | 1.0<br>(0.9; 1.2) |
| Animal fats                                        | 1.1<br>(1.1; 1.2) | 0.7<br>(0.6; 0.8)      | 1.1<br>(1.0; 1.2) | 1.6<br>(1.5; 1.8) | 1.0<br>(0.9; 1.1)  | 1.2<br>(1.1; 1.4) | 1.2<br>(1.1; 1.4) | 1.9<br>(1.7; 2.0)                        | 1.0<br>(0.9; 1.2) | 0.5<br>(0.5; 0.6) | 1.5<br>(1.2; 1.7)    | 1.3<br>(1.2; 1.4) | 0.8<br>(0.7; 0.9) |
| Milk, fermented milk drinks and cheese curd        | 1.1<br>(1.0; 1.1) | 1.2<br>(1.0; 1.3)      | 1.0<br>(0.9; 1.1) | 1.1<br>(1.0; 1.2) | 0.7<br>(0.6; 0.8)  | 1.1<br>(1.0; 1.2) | 1.4<br>(1.3; 1.6) | 0.9<br>(0.8; 1.0)                        | 1.2<br>(1.1; 1.3) | 1.1<br>(1.0; 1.2) | 0.8<br>(0.6; 0.9)    | 1.0<br>(0.9; 1.1) | 1.3<br>(1.1; 1.4) |
| Refined cereals                                    | 0.9<br>(0.9; 1.0) | 0.4<br>(0.3; 0.4)      | 0.9<br>(0.8; 1.0) | 1.5<br>(1.4; 1.6) | 1.2<br>(1.1; 1.3)  | 0.8<br>(0.7; 0.9) | 0.8<br>(0.7; 0.9) | 0.9<br>(0.8; 1.1)                        | 0.8<br>(0.7; 0.9) | 1.1<br>(1.0; 1.2) | 1.5<br>(1.3; 1.7)    | 1.0<br>(0.9; 1.1) | 0.6<br>(0.5; 0.7) |
| Vegetables                                         | 1.2<br>(1.2; 1.3) | 1.2<br>(1.1; 1.3)      | 1.2<br>(1.2; 1.3) | 1.2<br>(1.1; 1.3) | 1.0<br>(0.9; 1.1)  | 1.2<br>(1.1; 1.3) | 1.5<br>(1.4; 1.6) | 1.3<br>(1.3; 1.4)                        | 1.2<br>(1.1; 1.3) | 1.1<br>(1.0; 1.2) | 0.9<br>(0.8; 1.0)    | 1.2<br>(1.1; 1.2) | 1.4<br>(1.3; 1.5) |
| Fruit                                              | 1.0<br>(0.9; 1.0) | 1.0<br>(0.9; 1.1)      | 1.0<br>(0.9; 1.0) | 0.9<br>(0.8; 1.0) | 0.7<br>(0.6; 0.8)  | 0.9<br>(0.9; 1.0) | 1.3<br>(1.2; 1.3) | 1.0<br>(0.9; 1.1)                        | 1.0<br>(0.9; 1.1) | 1.0<br>(0.9; 1.0) | 0.7<br>(0.5; 0.8)    | 0.9<br>(0.8; 1.0) | 1.2<br>(1.1; 1.2) |
| Wholemeal cereals                                  | 0.9<br>(0.8; 1.0) | 1.3<br>(1.2; 1.4)      | 0.9<br>(0.7; 1.0) | 0.5<br>(0.4; 0.6) | 0.5<br>(0.4; 0.6)  | 0.9<br>(0.8; 1.0) | 1.3<br>(1.1; 1.4) | 0.9<br>(0.8; 1.0)                        | 1.0<br>(0.8; 1.1) | 0.8<br>(0.7; 0.9) | 0.3<br>(0.1; 0.4)    | 0.8<br>(0.7; 0.9) | 1.3<br>(1.1; 1.4) |
| Potatoes                                           | 0.6<br>(0.6; 0.7) | 0.4<br>(0.3; 0.4)      | 0.7<br>(0.6; 0.7) | 0.8<br>(0.8; 0.8) | 0.7<br>(0.6; 0.7)  | 0.6<br>(0.5; 0.6) | 0.6<br>(0.6; 0.7) | 0.7<br>(0.6; 0.7)                        | 0.6<br>(0.5; 0.6) | 0.6<br>(0.6; 0.7) | 0.6<br>(0.6; 0.7)    | 0.7<br>(0.6; 0.7) | 0.5<br>(0.5; 0.6) |
| Vegetable oils                                     | 0.6<br>(0.6; 0.6) | 0.5<br>(0.5; 0.6)      | 0.6<br>(0.6; 0.7) | 0.7<br>(0.7; 0.8) | 0.5<br>(0.4; 0.5)  | 0.7<br>(0.6; 0.7) | 0.7<br>(0.7; 0.8) | 0.6<br>(0.6; 0.7)                        | 0.6<br>(0.5; 0.6) | 0.6<br>(0.6; 0.7) | 0.5<br>(0.4; 0.6)    | 0.6<br>(0.6; 0.7) | 0.6<br>(0.6; 0.7) |
| Other fats                                         | 0.5<br>(0.4; 0.5) | 0.3<br>(0.2; 0.4)      | 0.5<br>(0.4; 0.6) | 0.6<br>(0.5; 0.7) | 0.6<br>(0.5; 0.7)  | 0.3<br>(0.2; 0.4) | 0.5<br>(0.4; 0.6) | 0.1<br>(0.1; 0.1)                        | 0.2<br>(0.1; 0.2) | 1.1<br>(1.0; 1.2) | 0.5<br>(0.3; 0.7)    | 0.5<br>(0.4; 0.6) | 0.4<br>(0.3; 0.5) |
| Cheese                                             | 0.4<br>(0.3; 0.4) | 0.3<br>(0.3; 0.4)      | 0.4<br>(0.3; 0.4) | 0.4<br>(0.4; 0.5) | 0.3<br>(0.2; 0.3)  | 0.3<br>(0.3; 0.4) | 0.5<br>(0.4; 0.5) | 0.4<br>(0.3; 0.4)                        | 0.3<br>(0.3; 0.4) | 0.4<br>(0.4; 0.5) | 0.4<br>(0.3; 0.4)    | 0.4<br>(0.3; 0.4) | 0.4<br>(0.3; 0.4) |
| White meat                                         | 0.4<br>(0.4; 0.5) | 0.4<br>(0.3; 0.4)      | 0.5<br>(0.4; 0.5) | 0.5<br>(0.5; 0.5) | 0.4<br>(0.4; 0.5)  | 0.4<br>(0.4; 0.5) | 0.5<br>(0.4; 0.5) | 0.4<br>(0.3; 0.4)                        | 0.5<br>(0.4; 0.5) | 0.5<br>(0.5; 0.6) | 0.4<br>(0.4; 0.5)    | 0.5<br>(0.4; 0.5) | 0.4<br>(0.4; 0.5) |
| Juices                                             | 0.5<br>(0.4; 0.5) | 0.3<br>(0.3; 0.4)      | 0.5<br>(0.4; 0.6) | 0.6<br>(0.5; 0.7) | 0.2<br>(0.2; 0.3)  | 0.4<br>(0.3; 0.5) | 0.8<br>(0.7; 0.9) | 0.5<br>(0.4; 0.6)                        | 0.5<br>(0.4; 0.6) | 0.4<br>(0.4; 0.5) | 0.4<br>(0.3; 0.5)    | 0.5<br>(0.4; 0.5) | 0.5<br>(0.4; 0.6) |
| Eggs                                               | 0.4<br>(0.3; 0.4) | 0.3<br>(0.3; 0.3)      | 0.3<br>(0.3; 0.4) | 0.4<br>(0.4; 0.5) | 0.2<br>(0.2; 0.3)  | 0.3<br>(0.3; 0.4) | 0.5<br>(0.5; 0.6) | 0.4<br>(0.4; 0.5)                        | 0.3<br>(0.3; 0.4) | 0.3<br>(0.3; 0.4) | 0.3<br>(0.3; 0.4)    | 0.3<br>(0.3; 0.4) | 0.4<br>(0.3; 0.4) |
| Sweetened milk beverages and flavored cheese curds | 0.3<br>(0.3; 0.4) | 0.2<br>(0.1; 0.2)      | 0.3<br>(0.2; 0.4) | 0.5<br>(0.4; 0.6) | 0.2<br>(0.1; 0.2)  | 0.3<br>(0.2; 0.4) | 0.5<br>(0.4; 0.6) | 0.2<br>(0.1; 0.2)                        | 0.3<br>(0.2; 0.4) | 0.5<br>(0.4; 0.6) | 0.3<br>(0.2; 0.4)    | 0.3<br>(0.3; 0.4) | 0.3<br>(0.2; 0.3) |
| Fish                                               | 0.3<br>(0.2; 0.3) | 0.3<br>(0.2; 0.4)      | 0.3<br>(0.2; 0.3) | 0.3<br>(0.2; 0.3) | 0.1<br>(0.1; 0.2)  | 0.2<br>(0.2; 0.3) | 0.5<br>(0.4; 0.5) | 0.2<br>(0.2; 0.3)                        | 0.3<br>(0.2; 0.3) | 0.3<br>(0.2; 0.3) | 0.1<br>(0.1; 0.1)    | 0.2<br>(0.2; 0.3) | 0.4<br>(0.3; 0.4) |
| Nuts and seeds                                     | 0.3<br>(0.3; 0.4) | 0.5<br>(0.4; 0.6)      | 0.3<br>(0.2; 0.3) | 0.2<br>(0.1; 0.2) | 0.1<br>(0.1; 0.2)  | 0.3<br>(0.2; 0.4) | 0.6<br>(0.5; 0.7) | 0.4<br>(0.3; 0.5)                        | 0.4<br>(0.3; 0.5) | 0.3<br>(0.2; 0.3) | 0.0<br>(0.0; 0.0)    | 0.2<br>(0.2; 0.3) | 0.6<br>(0.5; 0.7) |

**Table S1. Cont.**

| Food groups <sup>#</sup>              | Total             | Dietary Patterns       |                   |                   |                    |                   |                   |                                          |                   |                   |                      |                   |                   |
|---------------------------------------|-------------------|------------------------|-------------------|-------------------|--------------------|-------------------|-------------------|------------------------------------------|-------------------|-------------------|----------------------|-------------------|-------------------|
|                                       |                   | 'Non-Healthy' tertiles |                   |                   | 'Prudent' tertiles |                   |                   | 'Margarine and Sweetened Dairy' tertiles |                   |                   | 'Polish-aMED' levels |                   |                   |
|                                       |                   | bottom                 | middle            | upper             | bottom             | middle            | upper             | bottom                                   | middle            | upper             | low                  | average           | high              |
| Sample size (n)                       | 420               | 139                    | 141               | 140               | 139                | 140               | 141               | 140                                      | 139               | 141               | 51                   | 224               | 145               |
| Legumes                               | 0.2<br>(0.2; 0.2) | 0.2<br>(0.2; 0.3)      | 0.2<br>(0.2; 0.2) | 0.2<br>(0.2; 0.3) | 0.1<br>(0.1; 0.1)  | 0.2<br>(0.1; 0.2) | 0.4<br>(0.3; 0.4) | 0.2<br>(0.1; 0.2)                        | 0.2<br>(0.2; 0.3) | 0.3<br>(0.2; 0.3) | 0.1<br>(0.0; 0.1)    | 0.2<br>(0.1; 0.2) | 0.3<br>(0.3; 0.4) |
| Breakfast cereals                     | 0.2<br>(0.1; 0.2) | 0.1<br>(0.1; 0.2)      | 0.2<br>(0.1; 0.2) | 0.2<br>(0.1; 0.2) | 0.0<br>(0.0; 0.1)  | 0.2<br>(0.1; 0.2) | 0.3<br>(0.2; 0.3) | 0.1<br>(0.0; 0.1)                        | 0.2<br>(0.1; 0.2) | 0.3<br>(0.2; 0.3) | 0.1<br>(0.0; 0.1)    | 0.2<br>(0.1; 0.2) | 0.2<br>(0.1; 0.3) |
| Sweetened beverages and energy drinks | 0.1<br>(0.0; 0.1) | 0.0<br>(0.0; 0.0)      | 0.0<br>(0.0; 0.0) | 0.1<br>(0.1; 0.2) | 0.0<br>(0.0; 0.1)  | 0.0<br>(0.0; 0.1) | 0.1<br>(0.1; 0.1) | 0.0<br>(0.0; 0.1)                        | 0.0<br>(0.0; 0.1) | 0.1<br>(0.1; 0.1) | 0.1<br>(0.0; 0.1)    | 0.1<br>(0.0; 0.1) | 0.1<br>(0.0; 0.1) |

'Polish-aMED' – 'Polish-adapted Mediterranean Diet' (range of points: 0-8), levels (in points): 'low' (0-2), 'average' (3-5), 'high' (6-8); <sup>#</sup>the frequency consumption was expressed as a times/day after assigning the values for categories of frequency consumption as follows: 'never or almost never'=0; 'once a month or less'=0.025; 'several times a month'=0.1; 'several times a week'=0.571; 'daily'=1; 'several times a day'=2; 95%CI – 95% confidence interval.

**Table S2.** Description of food groups for the ‘Polish-adapted Mediterranean Diet’ score (0-8 points) calculation – data for the Initial control sample (n=242).

| Food groups/food items                                                                                                                                                                                                                                                                                                                                                                                                                                                                                      | Frequency of consumption<br>(times/day)* |        | Criteria for 1 point                    |
|-------------------------------------------------------------------------------------------------------------------------------------------------------------------------------------------------------------------------------------------------------------------------------------------------------------------------------------------------------------------------------------------------------------------------------------------------------------------------------------------------------------|------------------------------------------|--------|-----------------------------------------|
|                                                                                                                                                                                                                                                                                                                                                                                                                                                                                                             | Mean (95% CI)                            | Median |                                         |
| <b>VEGETABLES:</b> all kinds of vegetables: cruciferous vegetables (cabbages, brussel sprouts, cauliflower, broccoli, kale, etc.), yellow-orange vegetables (carrots, peppers, etc.), leafy green vegetables (spinach, chicory, lettuce, rocket, leek, celery, parsley, etc.), tomatoes, gourds and squashes (fresh cucumber, marrow, courgettes, pumpkins, aubergines, etc.), root vegetables and other (parsnip, beetroots, onion, garlic, celeriac, radishes, turnip, salads and mixed vegetables, etc.) | 1.300 (1.230; 1.371)                     | 1.000  | Greater than median intake (times/day)* |
| <b>FRUIT:</b> all kinds of fruit: stone fruit (apricots, cherries, nectarines, peaches, plums, grapes, etc.), kiwi and citrus fruit (kiwi, oranges, mandarins, grapefruit, lemons, pomelos, etc.), tropical fruits (pineapples, watermelon, melons, fresh dates and figs, etc.), berries (strawberries, raspberries, blackberries, blueberries, redcurrants, blackcurrants, etc.), bananas, apples, pears, avocado                                                                                          | 0.989 (0.925; 1.052)                     | 1.000  | Greater than median intake (times/day)* |
| <b>WHOLEMEAL CEREALS:</b> wholemeal wheat or rye bread, seeded loafs, pumpernickel, wholemeal groats, wholemeal rice, wholemeal pasta                                                                                                                                                                                                                                                                                                                                                                       | 0.890 (0.799; 0.981)                     | 0.671  | Greater than median intake (times/day)* |
| <b>FISH:</b> lean fish (ollock, cod, perch, hake, carp to 1 kg, tuna, panga, trout, etc.) oily fish (salmon, sardines, herring, mackerel, eel, large carp, etc.)                                                                                                                                                                                                                                                                                                                                            | 0.293 (0.253; 0.334)                     | 0.200  | Greater than median intake (times/day)* |
| <b>LEGUMES:</b> fresh and tinned legumes (corn, green peas, green beans, etc.), dry and processed pulses beans (fava, broad, French, green), soya, peas, chickpea and processed pulses (baked beans, hummus, other bread spreads)                                                                                                                                                                                                                                                                           | 0.223 (0.187; 0.259)                     | 0.125  | Greater than median intake (times/day)* |
| <b>NUTS and SEEDS:</b> peanuts, hazelnuts, walnuts, almonds, pistachios, cashews, coconuts, chestnuts, etc., pumpkin seeds, sesame seeds, sunflower seeds, wheat germs, etc.                                                                                                                                                                                                                                                                                                                                | 0.375 (0.312; 0.438)                     | 0.125  | Greater than median intake (times/day)* |
| <b>RATIO of VEGETABLES OILS</b> (rapeseed oil, sunflower oil, linseed oil, olives) <b>to ANIMAL FAT</b> (butter, cream, lard) instead of RATIO of MONOUNSATURATED to SATURATED FAT                                                                                                                                                                                                                                                                                                                          | 1.462 (1.125; 1.799)                     | 0.519  | Greater than median intake (times/day)* |
| <b>RED and PROCESSED MEAT:</b> red meat (pork, beef, veal, etc.), sausages, bacon, reconstituted meat (sausages, meat loaf, hot-dogs, smoked sausages, bacon, etc.), high quality cured meats (ham, poultry and pork-beef good quality cold meats, etc.), offal products (liver, blood sausage, sweetbread, liver pate, etc.), game (wild boar, venison, quail, mallard, hare, etc.)                                                                                                                        | 1.252 (1.151; 1.352)                     | 1.267  | Lower than median intake (times/day)*   |

\*food frequency consumption was expressed as a times/day after assigning the values for categories of frequencies as follows: ‘never or almost never’=0; ‘once a month or less’=0.025; ‘several times a month’=0.1; ‘several times a week’=0.571; ‘daily’=1; ‘several times a day’=2; 95% CI – 95% confidence interval.

**Table S3.** Confounders in the case-control study regarding association of dietary patterns and metabolic-hormone profiles with breast cancer risk.

| <b>Confounders</b>                                                               | <b>Categories</b>                                                                                                                                                                                                                                                                                                                                                                                                                                 |
|----------------------------------------------------------------------------------|---------------------------------------------------------------------------------------------------------------------------------------------------------------------------------------------------------------------------------------------------------------------------------------------------------------------------------------------------------------------------------------------------------------------------------------------------|
| <b>Age (years)</b>                                                               | 40.0-49.9; 50.0-59.9; 60.0-69.9; 70.0-79.9                                                                                                                                                                                                                                                                                                                                                                                                        |
| <b>Age at menarche (years)</b>                                                   | <12.0; 12-14.9; ≥15.0                                                                                                                                                                                                                                                                                                                                                                                                                             |
| <b>Menopausal status</b>                                                         | premenopausal; postmenopausal                                                                                                                                                                                                                                                                                                                                                                                                                     |
| <b>Oral contraceptive use (ever)</b>                                             | no; yes                                                                                                                                                                                                                                                                                                                                                                                                                                           |
| <b>Hormone-replacement therapy use</b>                                           | no; yes                                                                                                                                                                                                                                                                                                                                                                                                                                           |
| <b>Number of children</b>                                                        | 0; 1-2; ≥3                                                                                                                                                                                                                                                                                                                                                                                                                                        |
| <b>BMI (kg/m<sup>2</sup>)</b><br>calculated using measured weight and height     | ≤24.9; 25.0-29.9; ≥30.0                                                                                                                                                                                                                                                                                                                                                                                                                           |
| <b>Socioeconomic status (SES)</b><br>after combining data based on SES' factors: | low; average; high                                                                                                                                                                                                                                                                                                                                                                                                                                |
| place of residence                                                               | village<br>town <20,000 inhabitants<br>town 20,000-100,000 inhabitants<br>city >100,000 inhabitants                                                                                                                                                                                                                                                                                                                                               |
| educational level                                                                | primary<br>secondary<br>higher                                                                                                                                                                                                                                                                                                                                                                                                                    |
| economic situation<br>(self-declared)                                            | below average<br>average<br>above average                                                                                                                                                                                                                                                                                                                                                                                                         |
| situation of household (self-declared)                                           | we live poorly – I don't have enough resources even for basic needs (food/clothing/housing fees)<br>we live very thriftily – I have enough resources only for basic needs (food/clothing/housing fees)<br>we live thriftily – so I have enough resources for everything<br>we live well – I have enough resources for everything, but I don't put off savings<br>we live very well – I have enough resources for everything and I put off savings |

**Table S3. Cont.**

|                                                                                                                                         |                                                                |                                                                                                                                     |
|-----------------------------------------------------------------------------------------------------------------------------------------|----------------------------------------------------------------|-------------------------------------------------------------------------------------------------------------------------------------|
| <b>Overall physical activity</b><br>after combining data based<br>on physical activity at work<br>and physical activity in leisure time | low; moderate; high                                            |                                                                                                                                     |
| physical activity at work                                                                                                               | low                                                            | more than 70% of working time spent sedentary or retired                                                                            |
|                                                                                                                                         | moderate                                                       | approx. 50% of working time spent sedentary and 50% of working time spent in an active manner                                       |
|                                                                                                                                         | high                                                           | approx. 70% of working time spent in an active manner or physical work related to great exertion                                    |
| physical activity in leisure time                                                                                                       | low                                                            | sedentary for most of the time, watching TV, reading books, walking 1-2 hours per week                                              |
|                                                                                                                                         | moderate                                                       | walking, bike riding, gymnastics, gardening, light physical activity performed 2-3 hours per week                                   |
|                                                                                                                                         | high                                                           | bike riding, jogging, gardening, sport activities involving physical exertion performed more than 3 hours weekly                    |
| <b>Abuse of alcohol</b>                                                                                                                 | no                                                             |                                                                                                                                     |
|                                                                                                                                         | yes                                                            | intake at least 1 bottle (0.5 liters) of beer or 2 glasses of wine (300ml) or 2 drinks (300ml) or 2 glasses of vodka (60ml) per day |
| <b>Smoking status</b>                                                                                                                   | non-smoker                                                     |                                                                                                                                     |
|                                                                                                                                         | smoker                                                         | current-smoker or/ and former-smoker                                                                                                |
| <b>Vitamin/mineral supplements use</b><br>(within last 12 months)                                                                       | no; yes                                                        |                                                                                                                                     |
| <b>Family history of breast cancer in first-<br/>or second-degree relative</b>                                                          | no; I don't know; yes                                          |                                                                                                                                     |
| <b>Molecular of breast cancer subtypes</b>                                                                                              | triple negative; ER-, PR-, HER2+ subtype; luminal A; luminal B |                                                                                                                                     |

**Table S4.** ‘High-Hormone’ profile, serum hormone concentration and metabolic syndrome components by ‘Metabolic-Syndrome’ profile (%).

| Variable                             | ‘Metabolic-Syndrome’ Profile (tertiles) |                           |                            | p-Value |
|--------------------------------------|-----------------------------------------|---------------------------|----------------------------|---------|
|                                      | bottom                                  | middle                    | upper                      |         |
| Sample Size                          | 43                                      | 43                        | 43                         |         |
| <i>Hormones</i>                      |                                         |                           |                            |         |
| estradiol (pg/mL)*                   | 15.8 (57.0)                             | 11.0 (15.6)               | 14.8 (36.7)                | ns      |
| progesterone (ng/mL)*                | 0.19 (0.64)                             | 0.18 (0.33)               | 0.11 (0.14)                | ns      |
| prolactin (ng/mL)*                   | 10.7 (4.0)                              | 13.9 (17.0)               | 19.0 (30.9)                | ns      |
| testosterone (ng/mL)*                | 0.16 (0.09) <sup>ab</sup>               | 0.21 (0.11) <sup>a</sup>  | 0.22 (0.15) <sup>b</sup>   | ns      |
| cortisol (µg/dL)*                    | 15.6 (4.9)                              | 15.6 (7.8)                | 15.3 (7.2)                 | ns      |
| insulin (µU/mL)*                     | 6.4 (2.4) <sup>ab</sup>                 | 9.9 (5.9) <sup>ac</sup>   | 14.2 (10.0) <sup>bc</sup>  | <0.0001 |
| <i>Metabolic syndrome biomarkers</i> |                                         |                           |                            |         |
| triglycerides (mg/dL)*               | 81.0 (23.8) <sup>a</sup>                | 90.1 (24.9) <sup>b</sup>  | 141.1 (64.5) <sup>ab</sup> | <0.0001 |
| <150                                 | 100.0 <sup>a</sup>                      | 100.0 <sup>b</sup>        | 64.3 <sup>ab</sup>         | <0.0001 |
| ≥150                                 | 0.0 <sup>c</sup>                        | 0.0 <sup>d</sup>          | 35.7 <sup>cd</sup>         |         |
| HDL-cholesterol (mg/dL)*             | 81.2 (16.6) <sup>ab</sup>               | 68.8 (10.5) <sup>ac</sup> | 52.3 (10.4) <sup>bc</sup>  | <0.0001 |
| ≥50                                  | 100.0 <sup>a</sup>                      | 95.3 <sup>b</sup>         | 59.5 <sup>ab</sup>         | <0.0001 |
| <50                                  | 0.0 <sup>c</sup>                        | 4.7 <sup>d</sup>          | 40.5 <sup>cd</sup>         |         |
| glucose (mg/dL)*                     | 91.8 (9.4) <sup>ab</sup>                | 96.4 (10.3) <sup>a</sup>  | 100.3 (11.8) <sup>b</sup>  | 0.0018  |
| <100                                 | 79.1 <sup>a</sup>                       | 72.1 <sup>b</sup>         | 47.6 <sup>ab</sup>         | 0.0056  |
| ≥100                                 | 20.9 <sup>c</sup>                       | 27.9 <sup>d</sup>         | 52.4 <sup>cd</sup>         |         |
| hypertension (self-reported)         | 0.0 <sup>ab</sup>                       | 20.9 <sup>ac</sup>        | 61.9 <sup>bc</sup>         | <0.0001 |
| waist circumference (cm)*            | 78.2 (6.9) <sup>ab</sup>                | 88.9 (8.4) <sup>ac</sup>  | 99.1 (10.7) <sup>bc</sup>  | <0.0001 |
| <88                                  | 93.0 <sup>ab</sup>                      | 41.9 <sup>ac</sup>        | 16.7 <sup>bc</sup>         | <0.0001 |
| ≥88                                  | 7.0 <sup>de</sup>                       | 58.1 <sup>df</sup>        | 83.3 <sup>ef</sup>         |         |
| Metabolic syndrome Score (MetS)*     | 0.3 (0.5) <sup>ab</sup>                 | 1.1 (0.8) <sup>ac</sup>   | 2.7 (1.0) <sup>bc</sup>    | <0.0001 |
| 0                                    | 72.1 <sup>ab</sup>                      | 18.6 <sup>ac</sup>        | 0.0 <sup>bc</sup>          |         |
| 1-2                                  | 27.9 <sup>de</sup>                      | 76.7 <sup>df</sup>        | 47.6 <sup>ef</sup>         | <0.0001 |
| 3-5                                  | 0.0 <sup>g</sup>                        | 4.7 <sup>h</sup>          | 52.4 <sup>gh</sup>         |         |
| without metabolic syndrome (0-2)     | 100.0 <sup>a</sup>                      | 95.3 <sup>b</sup>         | 47.6 <sup>ab</sup>         | <0.0001 |
| with metabolic syndrome (3-5)        | 0.0 <sup>c</sup>                        | 4.7 <sup>d</sup>          | 52.4 <sup>cd</sup>         |         |
| total cholesterol (mg/dL)*           | 229.1 (36.9) <sup>ab</sup>              | 208.5 (36.7) <sup>a</sup> | 203.3 (47.6) <sup>b</sup>  | 0.0097  |
| LDL-cholesterol (mg/dL)*             | 134.1 (32.6)                            | 121.7 (31.8)              | 123.6 (44.6)               | ns      |
| log TG/HDL*                          | 0.0 (0.2) <sup>ab</sup>                 | 0.1 (0.1) <sup>ac</sup>   | 0.4 (0.2) <sup>bc</sup>    | <0.0001 |
| <0.50                                | 100.0 <sup>a</sup>                      | 100.0 <sup>b</sup>        | 69.0 <sup>ab</sup>         | <0.0001 |
| ≥0.50                                | 0.0 <sup>c</sup>                        | 0.0 <sup>d</sup>          | 31.0 <sup>cd</sup>         |         |
| LDL/HDL*                             | 1.7 (0.5) <sup>a</sup>                  | 1.8 (0.5) <sup>b</sup>    | 2.5 (1.2) <sup>ab</sup>    | 0.0001  |
| <3.50                                | 100.0 <sup>a</sup>                      | 100.0 <sup>b</sup>        | 83.3 <sup>ab</sup>         | 0.0005  |
| ≥3.50                                | 0.0 <sup>c</sup>                        | 0.0 <sup>d</sup>          | 16.7 <sup>cd</sup>         |         |
| non-HDL (mg/dL)*                     | 148.0 (32.8)                            | 139.7 (32.7)              | 151.0 (48.3)               | ns      |
| <145                                 | 46.5                                    | 53.5                      | 45.2                       | ns      |
| ≥145                                 | 53.5                                    | 46.5                      | 54.8                       |         |

HDL – high-density lipoprotein; LDL – low-density lipoprotein; TG – triglycerides; % – sample percentage; \*mean and standard deviation (SD); p-value – level of significance verified with by chi<sup>2</sup> test (categorical variables) or Kruskal-Wallis’ test (continuous variables) or Student’s t-test (for log-transformed serum

biomarkers concentration); a-a, ..., h-h – statistically significant differences between pairs of the ‘Metabolic-Syndrome’ profile tertiles,  $p < 0.05$ .

**Table S5.** ‘Metabolic-Syndrome’ profile, metabolic syndrome components and serum hormone concentration by ‘High-Hormone’ profile (%).

| Variable                             | ‘High-Hormone’ Profile (tertiles) |                           |                           | p-Value |
|--------------------------------------|-----------------------------------|---------------------------|---------------------------|---------|
|                                      | bottom                            | middle                    | upper                     |         |
| Sample Size                          | 42                                | 44                        | 43                        |         |
| <i>‘Metabolic-Syndrome’ Profile</i>  |                                   |                           |                           |         |
| score*                               | 104.4 (44.6)                      | 113.3 (46.2)              | 116.3 (34.0)              | ns      |
| <i>tertiles</i>                      |                                   |                           |                           |         |
| bottom                               | 42.9 <sup>a</sup>                 | 40.9 <sup>b</sup>         | 16.7 <sup>ab</sup>        | 0.0443  |
| middle                               | 26.2                              | 36.4                      | 38.1                      |         |
| upper                                | 31.0                              | 22.7 <sup>c</sup>         | 45.2 <sup>c</sup>         |         |
| <i>Hormones</i>                      |                                   |                           |                           |         |
| estradiol (pg/mL)*                   | 6.8 (4.3) <sup>a</sup>            | 7.7 (8.8)                 | 27.5 (67.5) <sup>a</sup>  | 0.0006  |
| progesterone (ng/mL)*                | 0.07 (0.02) <sup>a</sup>          | 0.08 (0.03) <sup>b</sup>  | 0.34 (0.71) <sup>ab</sup> | <0.0001 |
| prolactin (ng/mL)*                   | 10.5 (3.5) <sup>a</sup>           | 9.6 (3.5) <sup>b</sup>    | 23.7 (34.0) <sup>ab</sup> | 0.0005  |
| testosterone (ng/mL)*                | 0.10 (0.05) <sup>ab</sup>         | 0.18 (0.08) <sup>ac</sup> | 0.31 (0.12) <sup>bc</sup> | <0.0001 |
| cortisol (µg/dL)*                    | 11.7 (3.8) <sup>ab</sup>          | 14.2 (4.8) <sup>ac</sup>  | 20.6 (7.6) <sup>bc</sup>  | <0.0001 |
| insulin (µU/mL)*                     | 13.0 (10.9) <sup>ab</sup>         | 8.2 (4.1) <sup>a</sup>    | 9.4 (4.6) <sup>b</sup>    | 0.0305  |
| <i>Metabolic syndrome biomarkers</i> |                                   |                           |                           |         |
| triglycerides (mg/dL)*               | 98.3 (48.4)                       | 108.2 (58.0)              | 104.6 (40.2)              | ns      |
| <150                                 | 90.5                              | 86.4                      | 88.1                      | ns      |
| ≥150                                 | 9.5                               | 13.6                      | 11.9                      |         |
| HDL-cholesterol (mg/dL)*             | 76.1 (19.5) <sup>ab</sup>         | 65.4 (14.9) <sup>a</sup>  | 61.3 (14.3) <sup>b</sup>  | 0.0007  |
| ≥50                                  | 90.5                              | 86.4                      | 78.6                      | ns      |
| <50                                  | 9.5                               | 13.6                      | 21.4                      |         |
| glucose (mg/dL)*                     | 99.5 (10.8)                       | 93.7 (10.8)               | 95.3 (11.0)               | 0.0410  |
| <100                                 | 52.4 <sup>a</sup>                 | 77.3 <sup>a</sup>         | 69.0                      | 0.0459  |
| ≥100                                 | 47.6 <sup>b</sup>                 | 22.7 <sup>b</sup>         | 31.0                      |         |
| hypertension (self-reported)         | 28.6                              | 18.2                      | 35.7                      | ns      |
| waist circumference (cm)*            | 87.4 (11.7)                       | 88.2 (12.0)               | 90.4 (13.0)               | ns      |
| <88                                  | 52.4                              | 56.8                      | 42.9                      | ns      |
| ≥88                                  | 47.6                              | 43.2                      | 57.1                      |         |
| Metabolic syndrome Score (MetS)*     | 1.4 (1.4)                         | 1.1 (1.3)                 | 1.6 (1.1)                 | ns      |
| 0                                    | 33.3                              | 40.9 <sup>a</sup>         | 16.7 <sup>a</sup>         | ns      |
| 1-2                                  | 42.9                              | 45.5                      | 64.3                      |         |
| 3-5                                  | 23.8                              | 13.6                      | 19.0                      |         |
| without metabolic syndrome (0-2)     | 76.2                              | 86.4                      | 81.0                      | ns      |
| with metabolic syndrome (3-5)        | 23.8                              | 13.6                      | 19.0                      |         |
| total cholesterol (mg/dL)*           | 218.9 (43.8)                      | 218.3 (30.6)              | 203.7 (48.8)              | ns      |
| LDL-cholesterol (mg/dL)*             | 125.6 (38.1)                      | 132.0 (30.4)              | 121.5 (41.5)              | ns      |
| log TG/HDL*                          | 0.1 (0.3)                         | 0.2 (0.3)                 | 0.2 (0.2)                 | ns      |
| <0.50                                | 92.9                              | 88.6                      | 88.1                      | ns      |
| ≥0.50                                | 7.1                               | 11.4                      | 11.9                      |         |

**Table S5. Cont.**

| Variable         | 'High-Hormone' Profile (tertiles) |                        |                        | p-Value |
|------------------|-----------------------------------|------------------------|------------------------|---------|
|                  | bottom                            | middle                 | upper                  |         |
| Sample Size      | 42                                | 44                     | 43                     |         |
| LDL/HDL*         | 1.7 (0.6) <sup>ab</sup>           | 2.2 (0.9) <sup>a</sup> | 2.1 (0.9) <sup>b</sup> | 0.0193  |
| <3.50            | 100.0 <sup>a</sup>                | 90.9 <sup>a</sup>      | 92.9                   | ns      |
| ≥3.50            | 0.0 <sup>b</sup>                  | 9.1 <sup>b</sup>       | 7.1                    |         |
| non-HDL (mg/dL)* | 142.9 (35.9)                      | 152.9 (33.6)           | 142.4 (45.3)           | ns      |
| <145             | 52.4                              | 38.6                   | 54.8                   | ns      |
| ≥145             | 47.6                              | 61.4                   | 45.2                   |         |

HDL – high-density lipoprotein; LDL – low-density lipoprotein; TG – triglycerides; % – sample percentage; \*mean and standard deviation (SD); p-value – level of significance verified with chi<sup>2</sup> test (categorical variables) or Kruskal-Wallis' test (continuous variables) or Student's t-test (for log-transformed serum biomarkers concentration); a-a, ..., c-c – statistically significant differences between pairs of the 'High-Hormone' profile tertiles,  $p < 0.05$ .
